# Supplementary material for: Notoginsenoside R1 (NGR1) regulates the AGE-RAGE signaling pathway by inhibiting RUNX2 expression to accelerate ferroptosis in breast cancer cells
Source: publisher site journal article supplement (doi:10.18632/aging.205940), 2024-06-14
Supplement: Supplementary file [file aging-v16-205940-supplementary-material-SD1.pdf]

SUPPLEMENTARY FIGURE

Created with SnapGene®

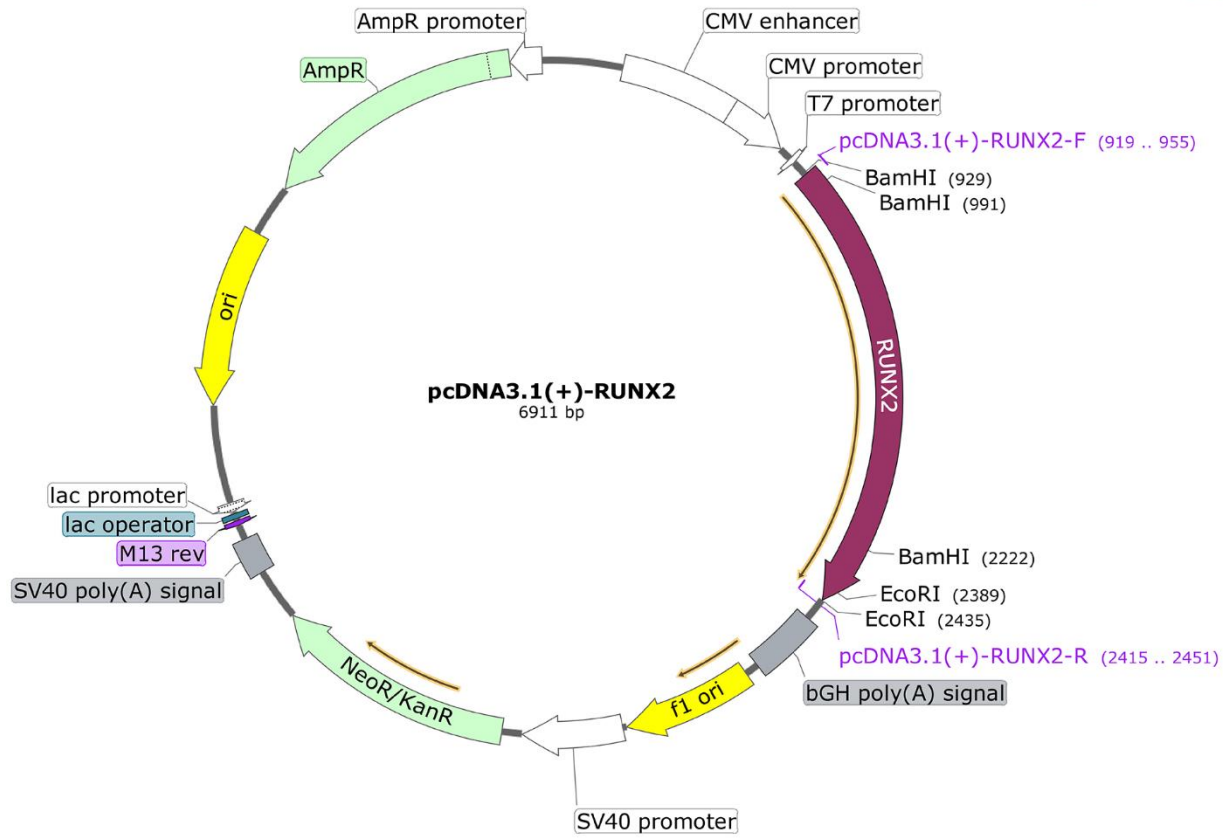

Supplementary Figure 1. RUNX2 overexpression plasmid construction map.
