# Supplementary material for: Notoginsenoside R1 (NGR1) regulates the AGE-RAGE signaling pathway by inhibiting RUNX2 expression to accelerate ferroptosis in breast cancer cells
Source: publisher site journal article supplement (doi:10.18632/aging.205940), 2024-06-14
Supplement: Supplementary file [file aging-v16i12-205940-supplementary-material-SD2.pdf]

## SUPPLEMENTARY TABLES

**Supplementary Table 1. QPCR primer sequences and the siRNA interference sequences and the MYLK overexpression sequences.**

| Gene            | Forward primer (5'-3')                    | Reverse primer (5'-3') |
|-----------------|-------------------------------------------|------------------------|
| RUNX2           | CTACCAGTGTTTGGAGGGCA                      | ATGCGTATGTGTGATCCGCCC  |
| GAPDH           | GATTCCACCCATGGCAAATTC                     | CTGGAAGATGGTGATGGGATT  |
| NC              | GGAAGUCUGUUAUCAGUAUC                      | UAUCUGAUAACAGACUCCUG   |
| Gene            | SS Sequence                               | AS Sequence            |
| SiNC            | GGUCUGUUAUAAUCAUAACC                      | UUAUUGAUGAAAACAGACCAA  |
| SiRUNX2-1       | GGUCUGUUAUCAUAUAACC                       | UUAUUGAUGAUAACAGACCAA  |
| SiRUNX2 -2      | GCAAAGACAUAAGUCAGCUAAA                    | UAGCUGACUAUGUCUUUGCUA  |
| SiRUNX2 -3      | GUGUUGAAAUGUUACUAUAGU                     | UAUAGUAACAUAUUAACACAA  |
| Gene            | Primer sequence (5'-3')                   |                        |
| pcDNA3.1-MYLK-F | TACCGAGCTCGGATCCATGGGGGATGTGAAGCTGGTTGC   |                        |
| pcDNA3.1-MYLK-R | GATATCTGCAGAATTCTCACTCTTCTTCCCTTCCCCTTCAC |                        |

**Supplementary Table 2. Summary of intersection gene expression in different data.**

| gene  | In this analysis, GSE205185 gene expression was used | Gene expression in TCGA breast cancer |
|-------|------------------------------------------------------|---------------------------------------|
| PPARG | Down                                                 | Down                                  |
| PTGS2 | Down                                                 | Down                                  |
| F3    | Down                                                 | Down                                  |
| IL6   | Down                                                 | Down                                  |
| CAT   | Down                                                 | Down                                  |
| ABCB1 | Down                                                 | Down                                  |
| ITGB2 | Up                                                   | -                                     |
| FN1   | Up                                                   | Up                                    |
| TNF   | Up                                                   | -                                     |
| RUNX2 | Up                                                   | Up                                    |
| PLAU  | Up                                                   | -                                     |
